# Supplementary material for: Guest capture, storage and removal in the TATM host framework: a single-crystal study
Source: Royal Society of Chemistry journal article supplement (doi:10.1039/b718592h), 2008-01-01
Supplement: b718592h.pdf [file b718592h.pdf]

## Supporting information

### Determination of host:guest ratios:

In the present study the host:guest ratio was obtained by refining the guest occupancies and then summing over the various overlapped sites. This has been shown to be a reliable method of obtaining remarkably accurate host:guest ratios *as long as the guest disorder model is correct* (we therefore first identified the symmetry-related and distinct sites that are overlapped from the 100% occupied crystals). When bulk samples are available we routinely correlate the single-crystal diffraction occupancies with those determined using Thermal Gravimetric Analysis (TGA) and quantitative high resolution NMR spectroscopy. Unfortunately, since pure-phase bulk samples were only available for the 100% occupied crystals we had to rely solely on the single-crystal analysis for the majority of the study.

**ESI. Table I:** Unit cell and conformational parameters as a function of guest occupancy for TATM/acetone and TATM/DCE.

| Crystal      | % Guest | $\tau_1(^{\circ})$ | $\tau_2(^{\circ})$ | $\tau_3(^{\circ})$ | $\angle_1(^{\circ})$ | $\angle_2(^{\circ})$ | $\angle_3(^{\circ})$ | Orientation of C=O wrt S |
|--------------|---------|--------------------|--------------------|--------------------|----------------------|----------------------|----------------------|--------------------------|
| TATM/acetone |         |                    |                    |                    |                      |                      |                      |                          |
| <b>1</b>     | 100     | 2.73               | 109.92             | 163.25             | 87.96(6)             | 25.79(9)             | 73.45(7)             | SSS                      |
| <b>1a</b>    | 84      | 3.80               | 109.37             | 162.85             | 87.39(8)             | 25.49(12)            | 73.21(9)             | SSS                      |
| <b>1b</b>    | 80      | 4.32               | 109.25             | 162.43             | 86.78(7)             | 25.46(11)            | 72.91(9)             | SSS                      |
| <b>1c</b>    | 60      | 5.57               | 109.84             | 161.89             | 85.82(12)            | 25.93(19)            | 72.27(15)            | SSS                      |
| <b>1d</b>    | 40      | 7.34               | 109.46             | 161.25             | 84.58(15)            | 26.06(24)            | 71.71(18)            | SSS                      |
| <b>1e</b>    | 24      | 7.47               | 111.11             | 160.94             | 84.09(14)            | 26.61(22)            | 71.11(17)            | SSS                      |
| TATM/DCE     |         |                    |                    |                    |                      |                      |                      |                          |
| <b>2</b>     | 100     | 6.60               | 104.76             | 160.49             | 85.56(5)             | 22.16(08)            | 70.76(6)             | SSS                      |
| <b>2a</b>    | 26      | 8.39               | 108.23             | 160.51             | 83.58(21)            | 24.98(34)            | 70.47(25)            | SSS                      |
| <b>2b</b>    | 24      | 8.28               | 109.05             | 160.23             | 83.74(18)            | 25.46(28)            | 70.43(21)            | SSS                      |
| <b>2c</b>    | 24      | 7.98               | 108.99             | 160.30             | 83.46(13)            | 25.23(20)            | 70.41(15)            | SSS                      |
| <b>2d</b>    | 21      | 7.46               | 109.19             | 160.26             | 83.83(18)            | 25.55(29)            | 70.29(22)            | SSS                      |
| <b>2e</b>    | 6       | 7.73               | 110.41             | 159.88             | 83.29(10)            | 26.55(15)            | 70.51(11)            | SSS                      |

**ESI. Table II:** Crystal data, data collection and final refinement parameters for **1aA**, **1bB** and **3**. All data sets are collected at 125K and analyzed in space group P-1.

| Crystal                                    | <b>1aA</b>                                                                      | <b>1bB</b>                                                                         | <b>3</b>                                                                                    |
|--------------------------------------------|---------------------------------------------------------------------------------|------------------------------------------------------------------------------------|---------------------------------------------------------------------------------------------|
| Empirical formula                          | 2(C <sub>19</sub> H <sub>16</sub> O <sub>3</sub> S <sub>3</sub> )<br>1(acetone) | 2(C <sub>19</sub> H <sub>16</sub> O <sub>3</sub> S <sub>3</sub> )<br>0.96(acetone) | 2(C <sub>19</sub> H <sub>16</sub> O <sub>3</sub> S <sub>3</sub> )<br>0.39(DCE)0.50(acetone) |
| Formula wt (g/mol)                         | 835.07                                                                          | 832.75                                                                             | 844.63                                                                                      |
| <i>a</i> (Å)                               | 8.1018(6)                                                                       | 8.1349(6)                                                                          | 8.036(3)                                                                                    |
| <i>b</i> (Å)                               | 10.5888(8)                                                                      | 10.5100(8)                                                                         | 10.800(4)                                                                                   |
| <i>c</i> (Å)                               | 12.3159(9)                                                                      | 12.3775(9)                                                                         | 12.235(5)                                                                                   |
| $\alpha$ (°)                               | 94.999(1)                                                                       | 94.624(1)                                                                          | 96.582(5)                                                                                   |
| $\beta$ (°)                                | 107.765(1)                                                                      | 108.274(1)                                                                         | 106.786(5)                                                                                  |
| $\gamma$ (°)                               | 95.960(1)                                                                       | 95.778(1)                                                                          | 96.366(5)                                                                                   |
| <i>V</i> (Å <sup>3</sup> )                 | 992.84(13)                                                                      | 992.70(13)                                                                         | 998.3(7)                                                                                    |
| Crystal dimensions                         | 0.32 × 0.32 × 0.16                                                              | 0.32 × 0.32 × 0.10                                                                 | 0.32 × 0.20 × 0.10                                                                          |
| Reflections measured                       | 12331                                                                           | 12349                                                                              | 10706                                                                                       |
| Unique reflections                         | 5473                                                                            | 5497                                                                               | 4055                                                                                        |
| <i>R</i> (int)                             | 0.0246                                                                          | 0.0159                                                                             | 0.0471                                                                                      |
| Final <i>R</i> indices (>2σ)<br>(all data) | <i>R</i> <sub>1</sub> = 0.0403<br><i>wR</i> <sub>2</sub> = 0.1214               | <i>R</i> <sub>1</sub> = 0.0325<br><i>wR</i> <sub>2</sub> = 0.0937                  | <i>R</i> <sub>1</sub> = 0.0877<br><i>wR</i> <sub>2</sub> = 0.2103                           |

**ESI. Table III:** Crystal data, collection and refinement parameters for the TATM/DCE/acetone mixed guest system. All data sets are collected at 100K and analyzed in space group P-1.

| DCE:acetone                                | <b>100:0</b>                                                                | <b>76:24</b>                                                                                | <b>64:36</b>                                                                                | <b>40:60</b>                                                                                | <b>0:100</b>                                                                    |
|--------------------------------------------|-----------------------------------------------------------------------------|---------------------------------------------------------------------------------------------|---------------------------------------------------------------------------------------------|---------------------------------------------------------------------------------------------|---------------------------------------------------------------------------------|
| Empirical formula                          | 2(C <sub>19</sub> H <sub>16</sub> O <sub>3</sub> S <sub>3</sub> )<br>1(DCE) | 2(C <sub>19</sub> H <sub>16</sub> O <sub>3</sub> S <sub>3</sub> )<br>0.76(DCE)0.24(acetone) | 2(C <sub>19</sub> H <sub>16</sub> O <sub>3</sub> S <sub>3</sub> )<br>0.64(DCE)0.36(acetone) | 2(C <sub>19</sub> H <sub>16</sub> O <sub>3</sub> S <sub>3</sub> )<br>0.40(DCE)0.60(acetone) | 2(C <sub>19</sub> H <sub>16</sub> O <sub>3</sub> S <sub>3</sub> )<br>1(acetone) |
| Formula wt (g/mol)                         | 875.95                                                                      | 866.14                                                                                      | 861.23                                                                                      | 851.42                                                                                      | 835.07                                                                          |
| <i>a</i> (Å)                               | 7.9495(7)                                                                   | 7.9555(3)                                                                                   | 7.9656(6)                                                                                   | 7.9717(6)                                                                                   | 8.1164(16)                                                                      |
| <i>b</i> (Å)                               | 10.9743(10)                                                                 | 10.9385(5)                                                                                  | 10.9124(8)                                                                                  | 10.8775(7)                                                                                  | 10.570(2)                                                                       |
| <i>c</i> (Å)                               | 12.1800(12)                                                                 | 12.1457(5)                                                                                  | 12.1583(9)                                                                                  | 12.1307(9)                                                                                  | 12.351(3)                                                                       |
| $\alpha$ (°)                               | 97.623(5)                                                                   | 97.452(2)                                                                                   | 97.297(3)                                                                                   | 97.149(4)                                                                                   | 95.006(7)                                                                       |
| $\beta$ (°)                                | 105.816(4)                                                                  | 105.862(2)                                                                                  | 105.982(4)                                                                                  | 106.072(4)                                                                                  | 107.786(6)                                                                      |
| $\gamma$ (°)                               | 96.665(4)                                                                   | 96.676(2)                                                                                   | 96.641(4)                                                                                   | 96.567(4)                                                                                   | 95.944(6)                                                                       |
| V (Å <sup>3</sup> )                        | 1000.33(16)                                                                 | 995.27(7)                                                                                   | 995.12(13)                                                                                  | 990.62(12)                                                                                  | 995.6(3)                                                                        |
| Crystal dimensions                         | 0.35 × 0.35 × 0.20                                                          | 0.35 × 0.20 × 0.12                                                                          | 0.56 × 0.32 × 0.28                                                                          | 0.20 × 0.28 × 0.32                                                                          | 0.16 × 0.15 × 0.15                                                              |
| Reflections measured                       | 35685                                                                       | 43763                                                                                       | 21863                                                                                       | 13226                                                                                       | 13911                                                                           |
| Unique reflections                         | 11389                                                                       | 14668                                                                                       | 9393                                                                                        | 5736                                                                                        | 4005                                                                            |
| <i>R</i> (int)                             | 0.0238                                                                      | 0.0246                                                                                      | 0.0296                                                                                      | 0.0325                                                                                      | 0.0534                                                                          |
| Final <i>R</i> indices (>2σ)<br>(all data) | <i>R</i> <sub>1</sub> = 0.0335<br><i>wR</i> <sub>2</sub> = 0.0949           | <i>R</i> <sub>1</sub> = 0.0368<br><i>wR</i> <sub>2</sub> = 0.1095                           | <i>R</i> <sub>1</sub> = 0.0444<br><i>wR</i> <sub>2</sub> = 0.1277                           | <i>R</i> <sub>1</sub> = 0.0478<br><i>wR</i> <sub>2</sub> = 0.1314                           | <i>R</i> <sub>1</sub> = 0.0597<br><i>wR</i> <sub>2</sub> = 0.1612               |
